# Supplementary material for: Combined Salivary Proteome Profiling and Machine Learning Analysis Provides Insight into Molecular Signature for Autoimmune Liver Diseases Classification
Source: MDPI journal article supplement (doi:10.3390/ijms241512207), 2023-07-30

Table S1: Demographic data of 17 AIHp, 17 PBCp and 17 HCs involved in the study.

| AIHp | Sex | Age | PBCp | Sex | Age | HCs | Sex | Age |
|------|-----|-----|------|-----|-----|-----|-----|-----|
| A02  | F   | 70  | P01  | F   | 60  | C05 | F   | 56  |
| A03  | F   | 64  | P02  | F   | 52  | C07 | F   | 48  |
| A06  | M   | 45  | P03  | F   | 58  | C09 | F   | 41  |
| A12  | F   | 74  | P06  | F   | 65  | C11 | F   | 44  |
| A13  | F   | 45  | P07  | F   | 82  | C18 | F   | 43  |
| A15  | F   | 83  | P08  | F   | 66  | C19 | F   | 63  |
| A16  | F   | 55  | P09  | F   | 64  | C22 | F   | 83  |
| A17  | F   | 60  | P10  | F   | 66  | C26 | F   | 73  |
| A18  | F   | 45  | P11  | F   | 83  | C28 | F   | 78  |
| A20  | F   | 68  | P13  | F   | 56  | C33 | F   | 46  |
| A24  | F   | 75  | P14  | F   | 52  | C36 | F   | 76  |
| A28  | F   | 57  | P20  | F   | 70  | C39 | F   | 51  |
| A31  | M   | 52  | P22  | F   | 55  | C40 | F   | 72  |
| A33  | F   | 53  | P24  | F   | 52  | C42 | F   | 52  |
| A38  | F   | 40  | P26  | F   | 69  | C44 | F   | 54  |
| A42  | F   | 75  | P30  | F   | 61  | C60 | F   | 63  |
| A43  | F   | 68  | P41  | F   | 61  | C65 | F   | 59  |

Table S2: Topological features of the network obtained from the 23 proteins varied among HCs, PBCp and AIHp. BC; Betweenness centrality; CC; Closeness Centrality.

| Uniprot ID | Gene name | Degree | BC       | CC       |
|------------|-----------|--------|----------|----------|
| P00558     | PGK1      | 5      | 0.712121 | 0.521739 |
| Q6NUR9     | YWHAZ     | 3      | 0.590909 | 0.5      |
| P23528     | CFL1      | 3      | 0.409090 | 0.413793 |
| P06396     | GSN       | 3      | 0.166666 | 0.324324 |
| P52790     | HK3       | 2      | 0.166666 | 0.375    |
| P22626     | HNRNPA2B1 | 3      | 0.075757 | 0.387096 |
| P23396     | RPS3      | 3      | 0.075757 | 0.387096 |
| P61247     | RPS3A     | 2      | 0.0      | 0.292682 |
| P46940     | IQGAP1    | 2      | 0.0      | 0.315789 |
| P15924     | DSP       | 2      | 0.0      | 1.0      |
| Q08554     | DSC1      | 2      | 0.0      | 1.0      |
| P14923     | JUP       | 2      | 0.0      | 1.0      |

|        |          |   |     |          |
|--------|----------|---|-----|----------|
| P27824 | CANX     | 1 | 0.0 | 0.342857 |
| Q86YZ3 | HRNR     | 1 | 0.0 | 1.0      |
| P08571 | CD14     | 1 | 0.0 | 0.279069 |
| P22528 | SPRR1B   | 1 | 0.0 | 1.0      |
| Q8N4F0 | BPIFB2   | 1 | 0.0 | 1.0      |
| P10909 | CLU      | 1 | 0.0 | 0.25     |
| Q96DR5 | BPIFA2   | 1 | 0.0 | 1.0      |
| P68366 | TUBA4A   | 1 | 0.0 | 0.352941 |
| P05089 | ARG1     | 0 | 0.0 | 0.0      |
| P09758 | TACSTD2  | 0 | 0.0 | 0.0      |
| P35237 | SERPINB6 | 0 | 0.0 | 0.0      |

Figure S1. SDS-PAGE of the acidic-insoluble fraction of saliva from HCs, PBCp and AIHp. Each lane was loaded with 10  $\mu$ g of solubilized proteins. Boxes indicate the three parts of the each lane at different molecular weight (portion A: 250-75 kDa, portion B: 75-25 kDa, portion C: 25 kDa-to the end of gel) that were cut into small pieces with scalpel and submitted to an in-gel digestion.

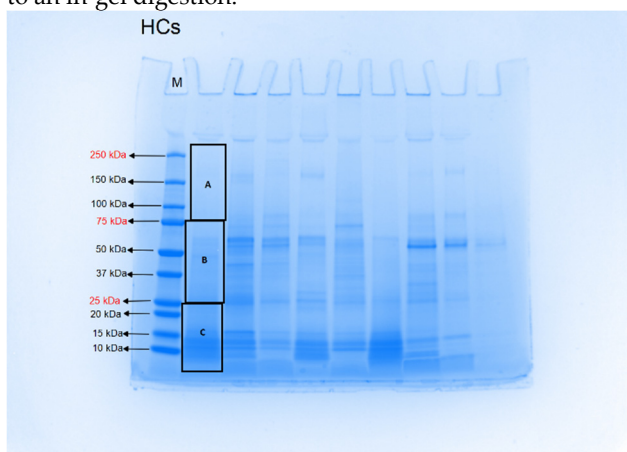

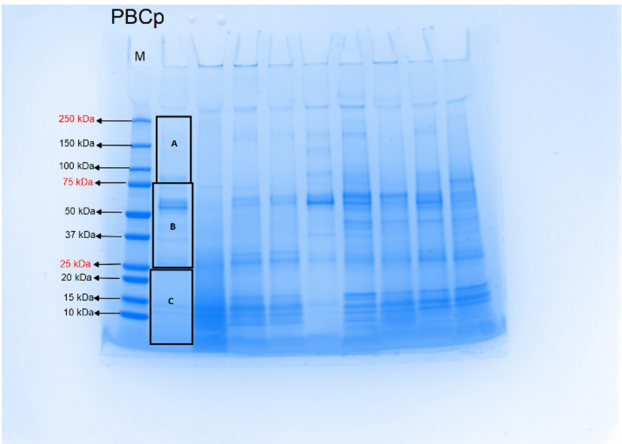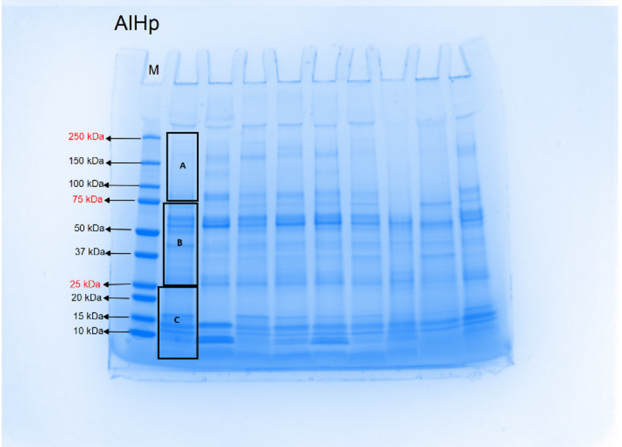

Supplement: s1 [file s1]
